# Supplementary material for: Durability of ChAdOx1 nCov-19 (AZD1222) vaccination in people living with HIV - responses to SARS-CoV-2, variants of concern and circulating coronaviruses
Source: bioRxiv or medRxiv preprint supplement (doi:10.1101/2021.09.28.21264207), 2021-09-29

# Supplementary figure 1: Flow cytometry gating strategy and kinetics of cells expressing activation and exhaustion markers

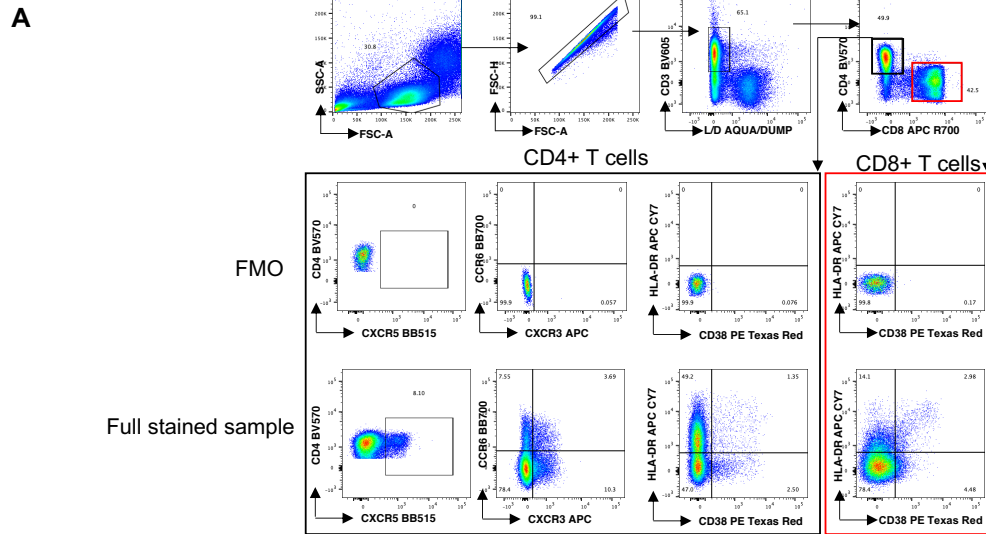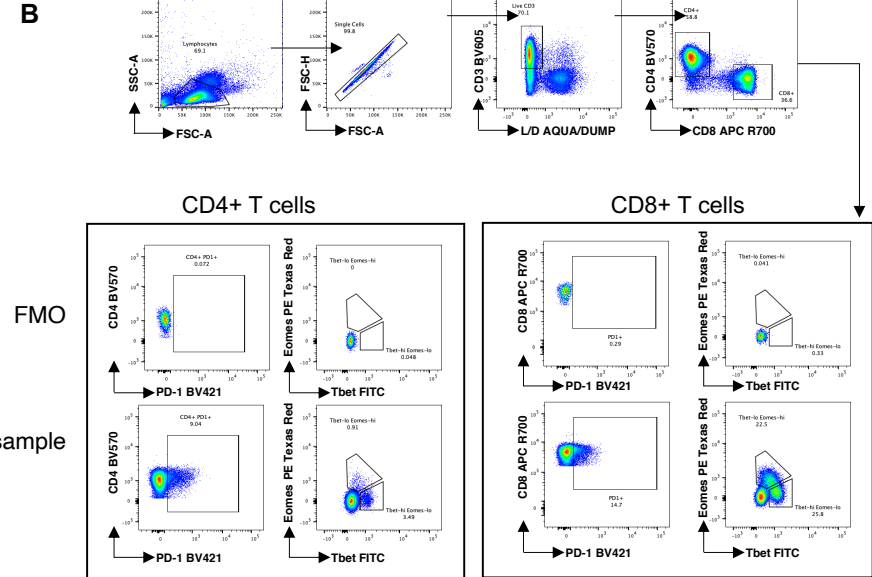

## CD4+ T cells

## CD8+ T cells

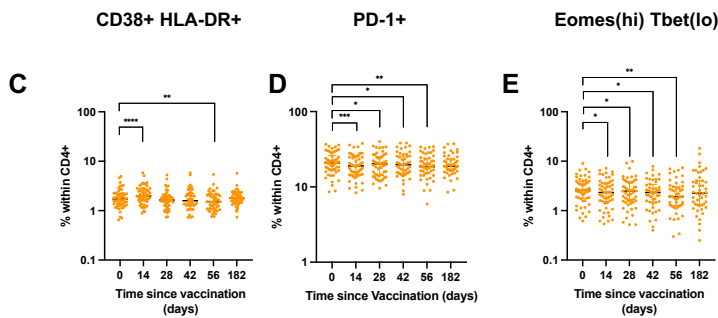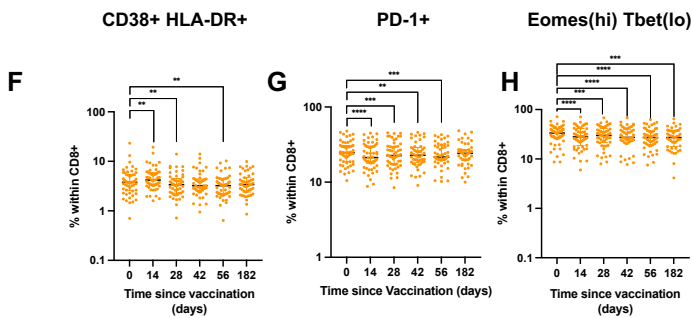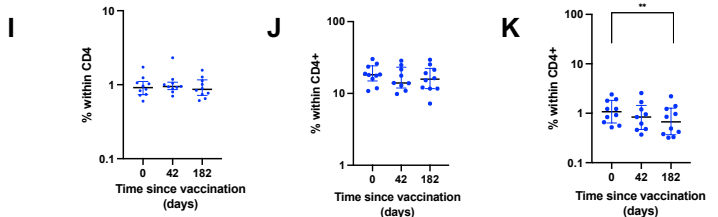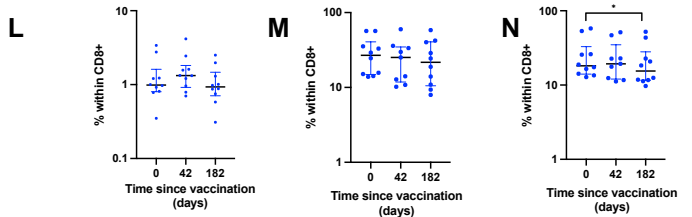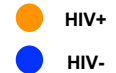

# Supplementary figure 2: Humoral immune responses against SARS-CoV-2 in PWH.

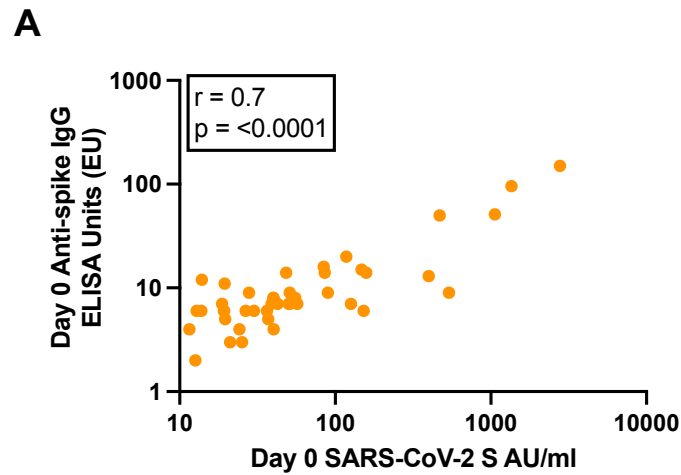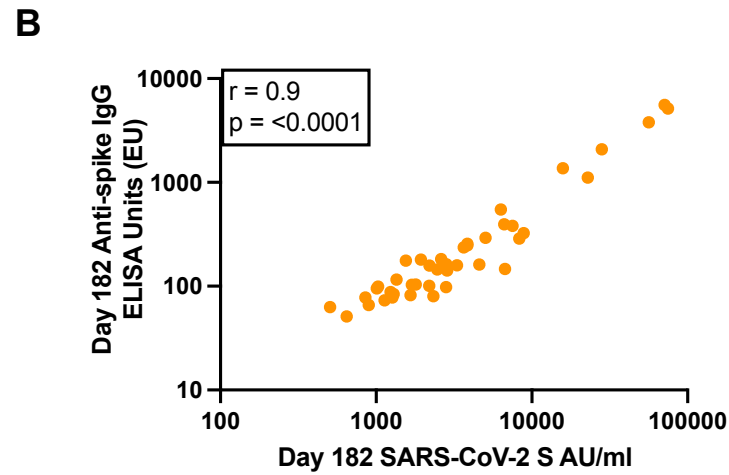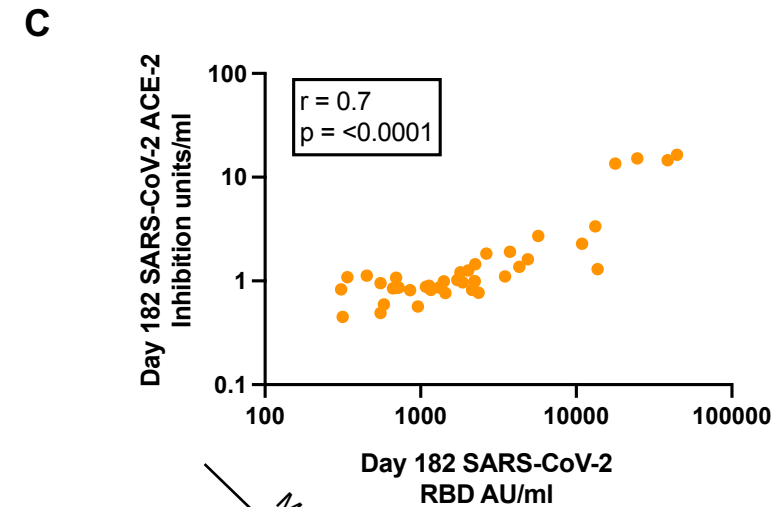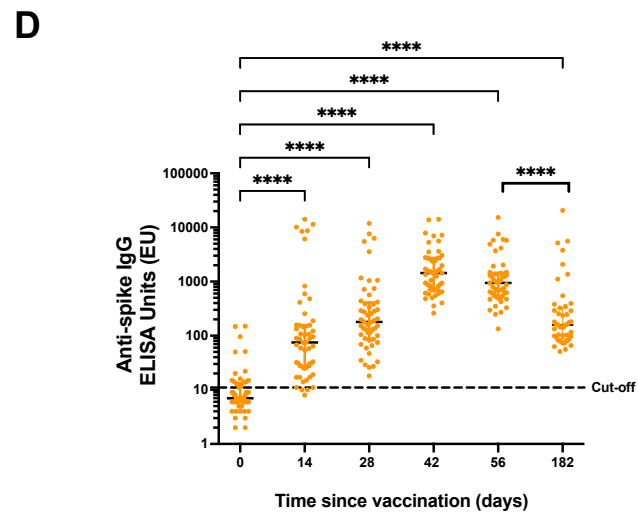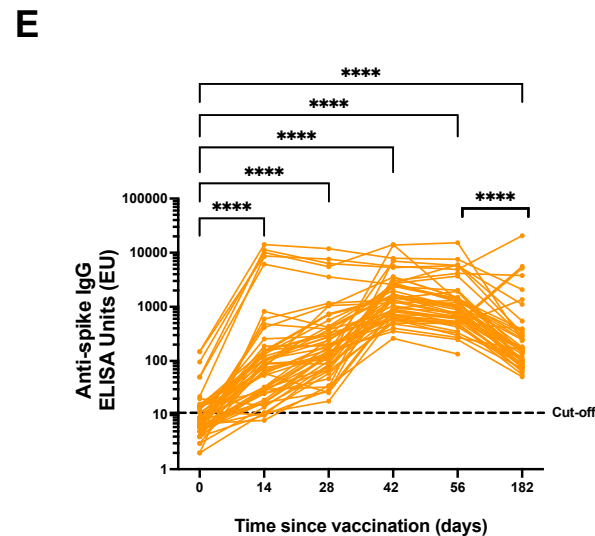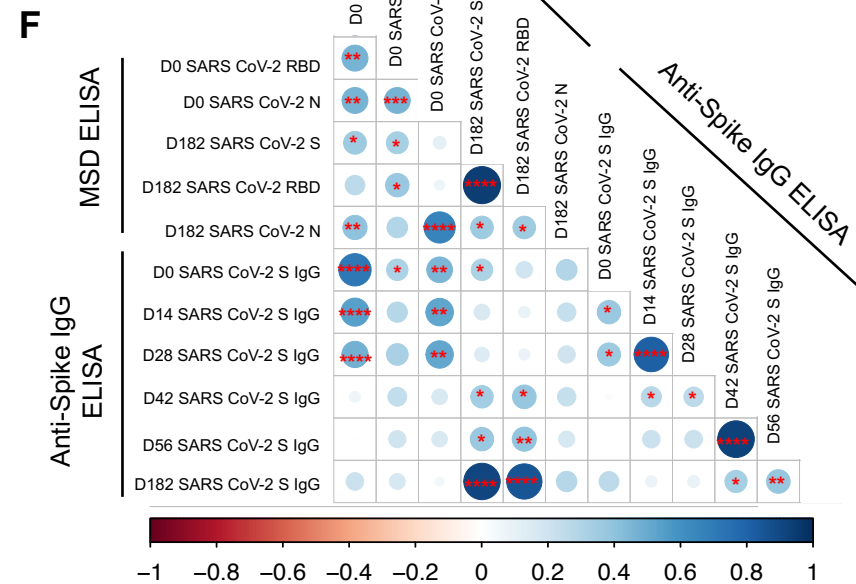

**Supplementary figure 3: Gating strategy and T cell response to control antigens (FECT) and mitogen (PHA).**

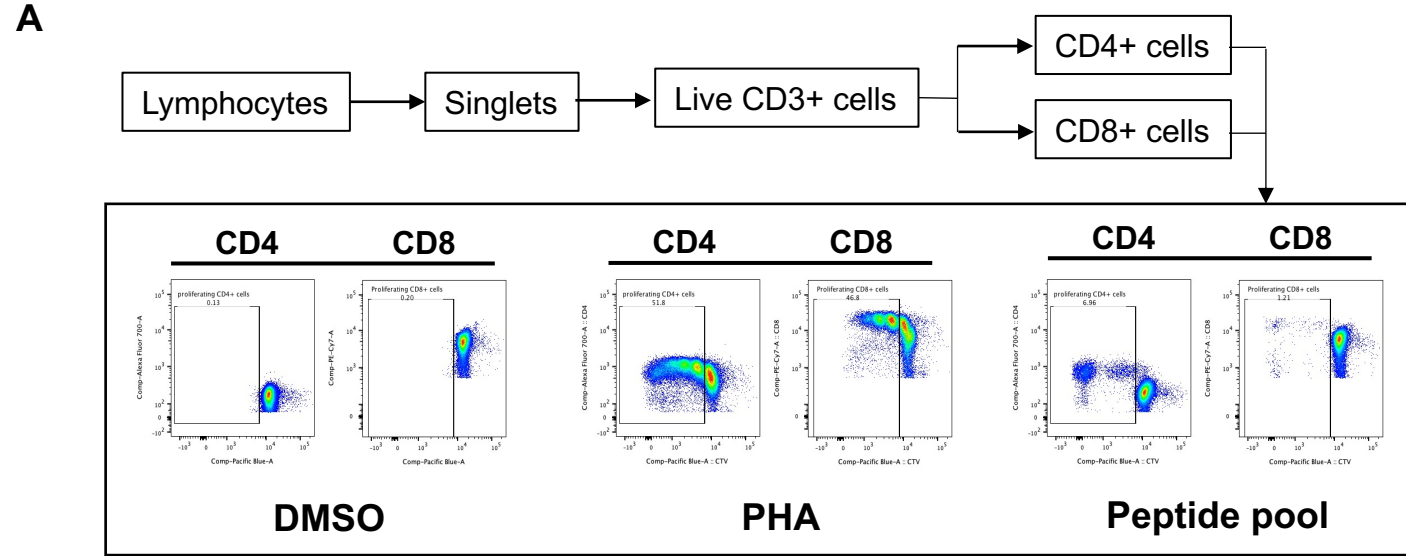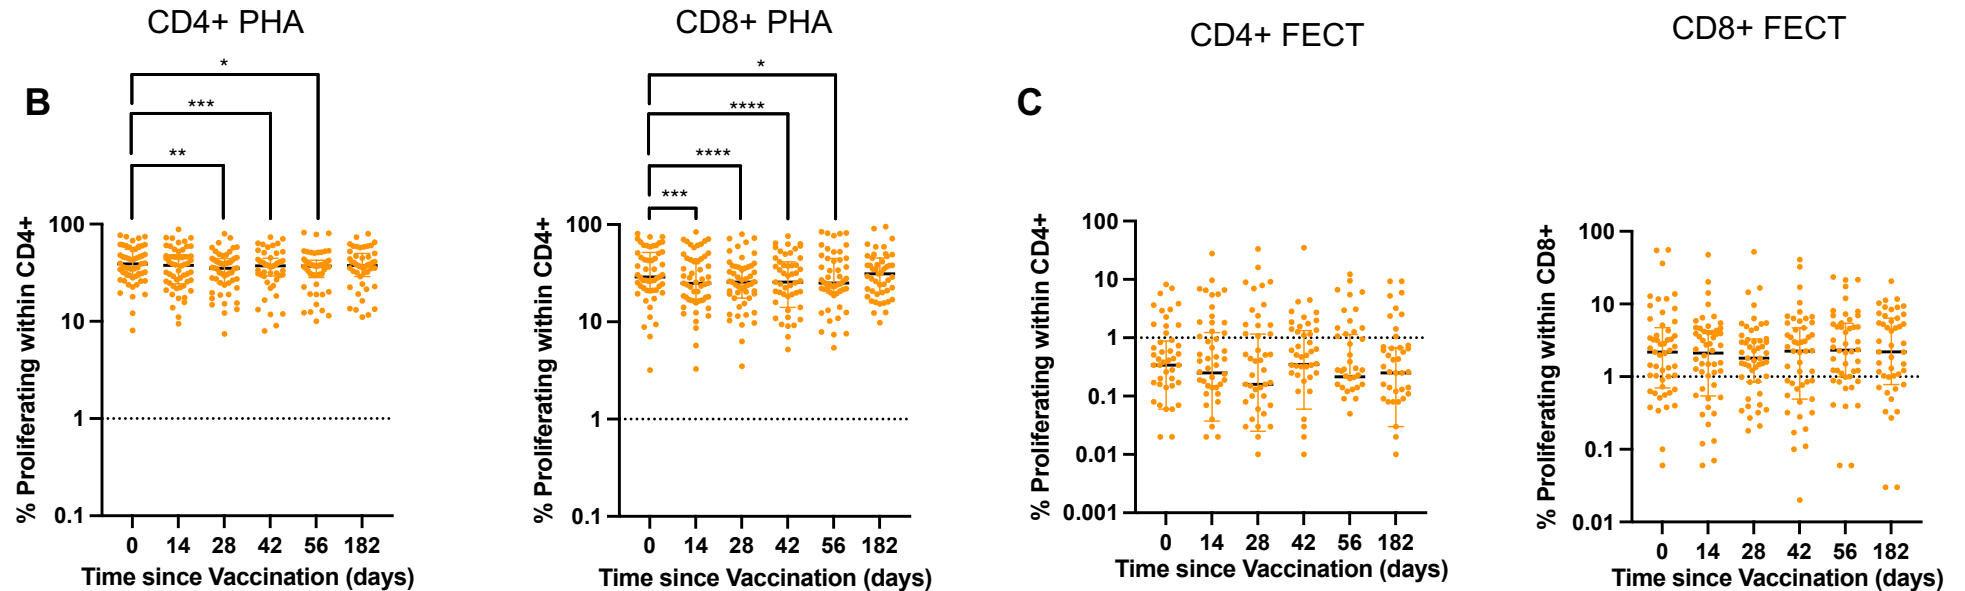

**Supplementary figure 4: Longitudinal T cell responses to SARS-CoV-2 in HIV+ and HIV- subjects following ChAdOx1 nCoV-19 vaccination**

● HIV+  
● HIV-

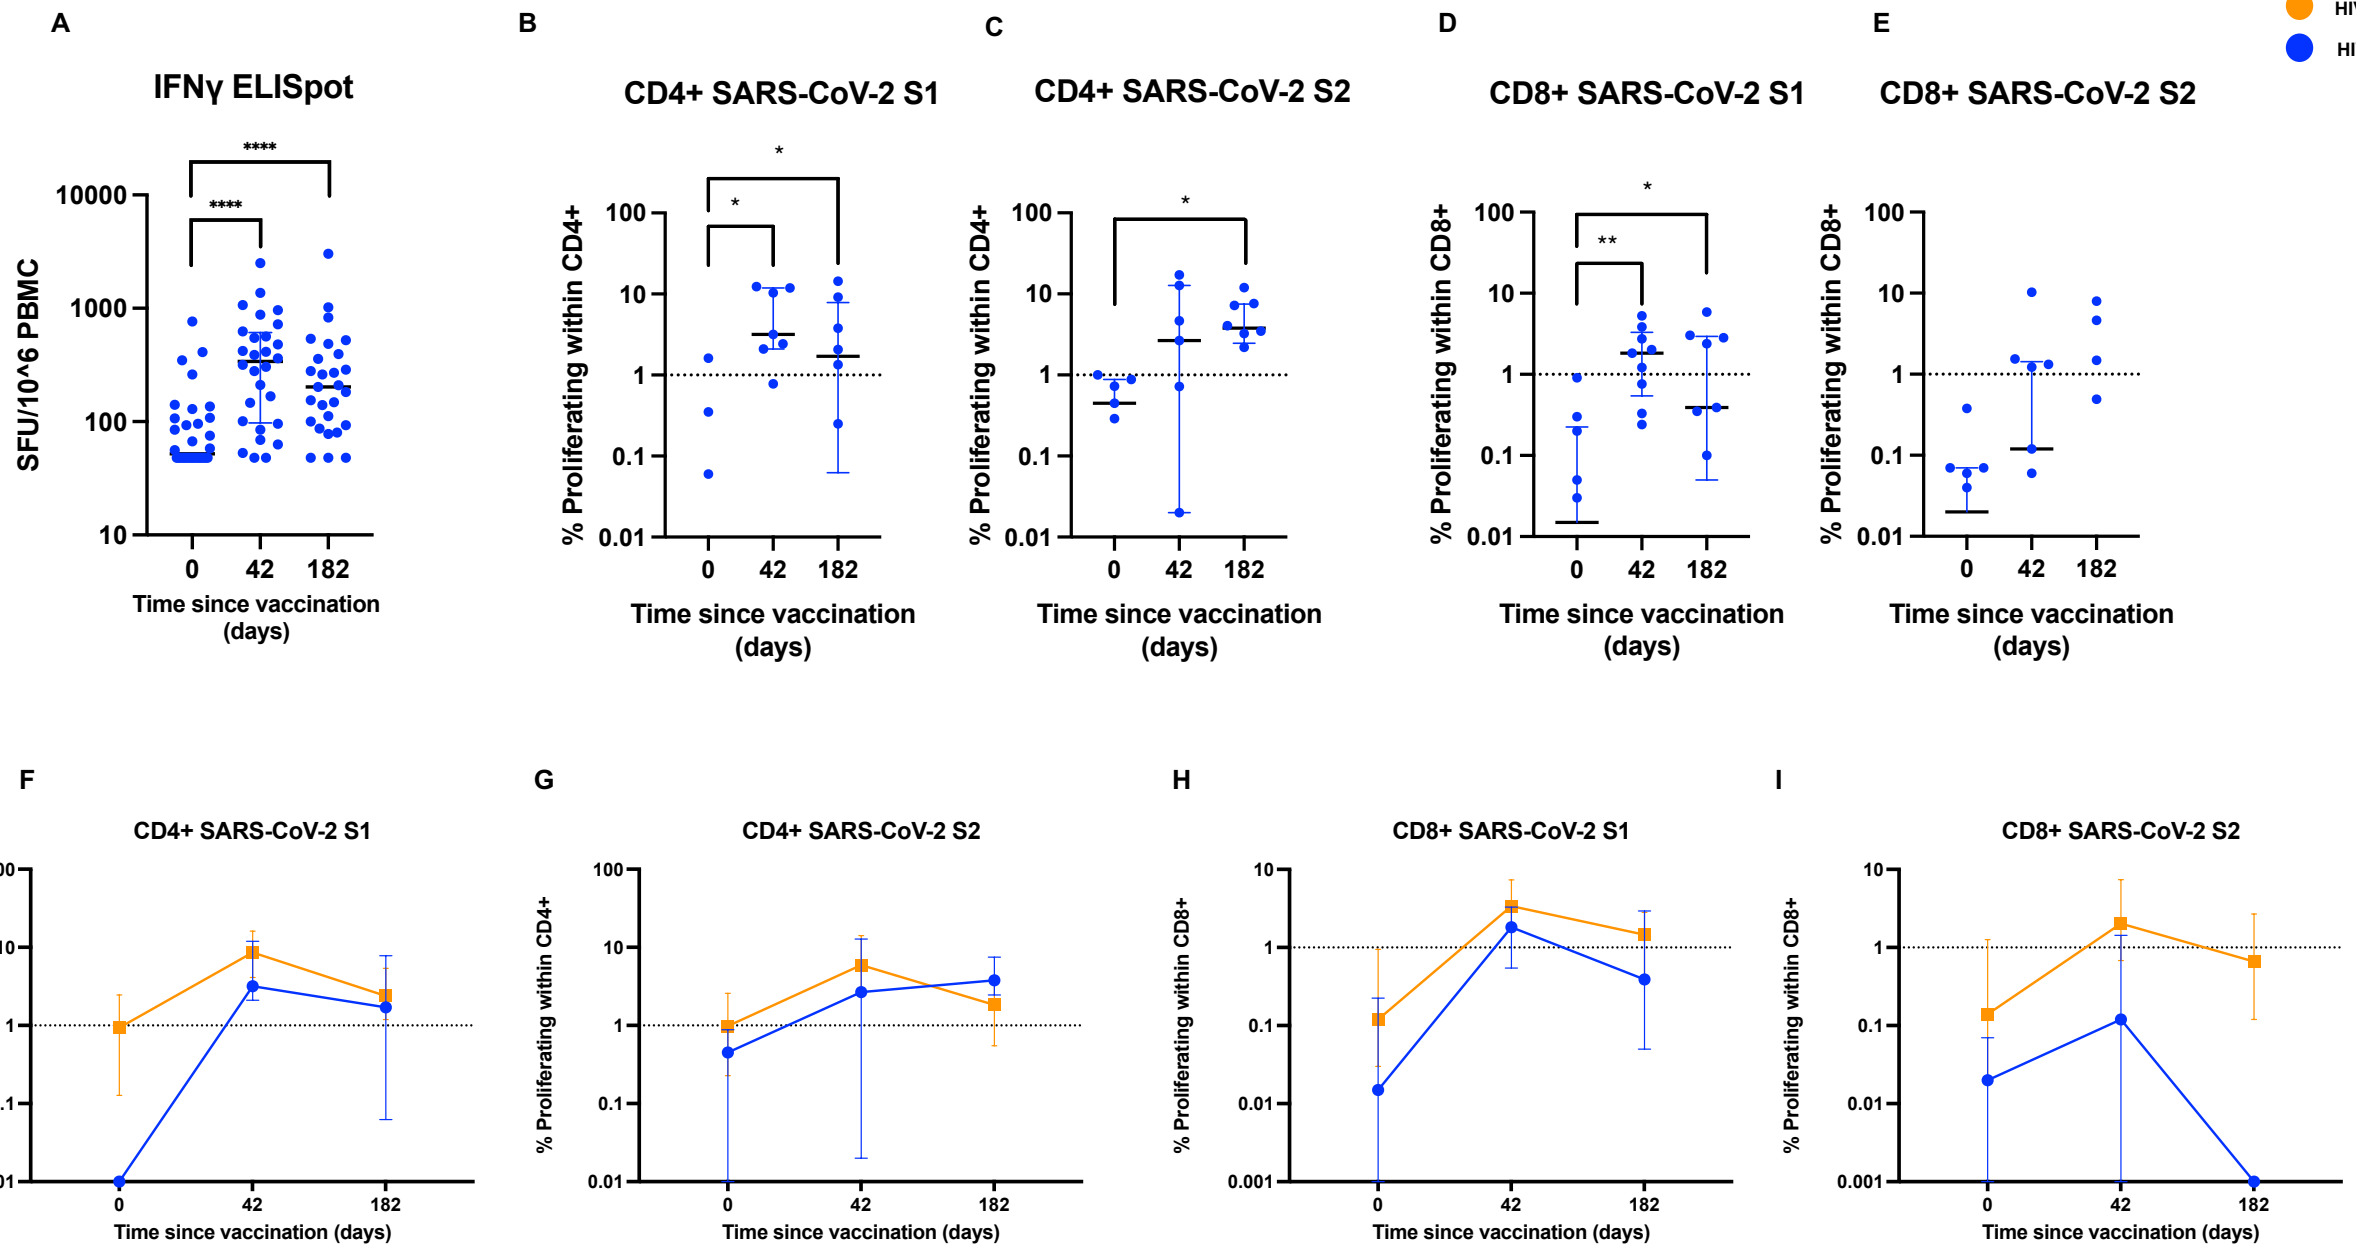

# Supplementary figure 5: Phenotype of total and SARS-CoV-2 S-specific circulating CD4+ T cells

## Total Circulating CD4+ T cells

**A**

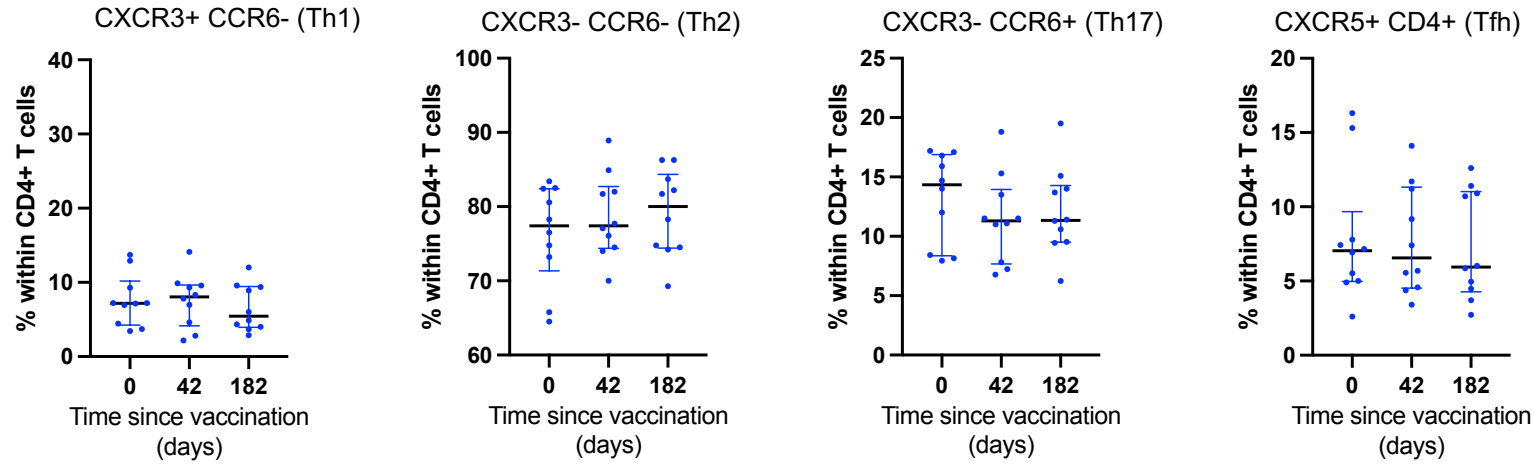

**B**

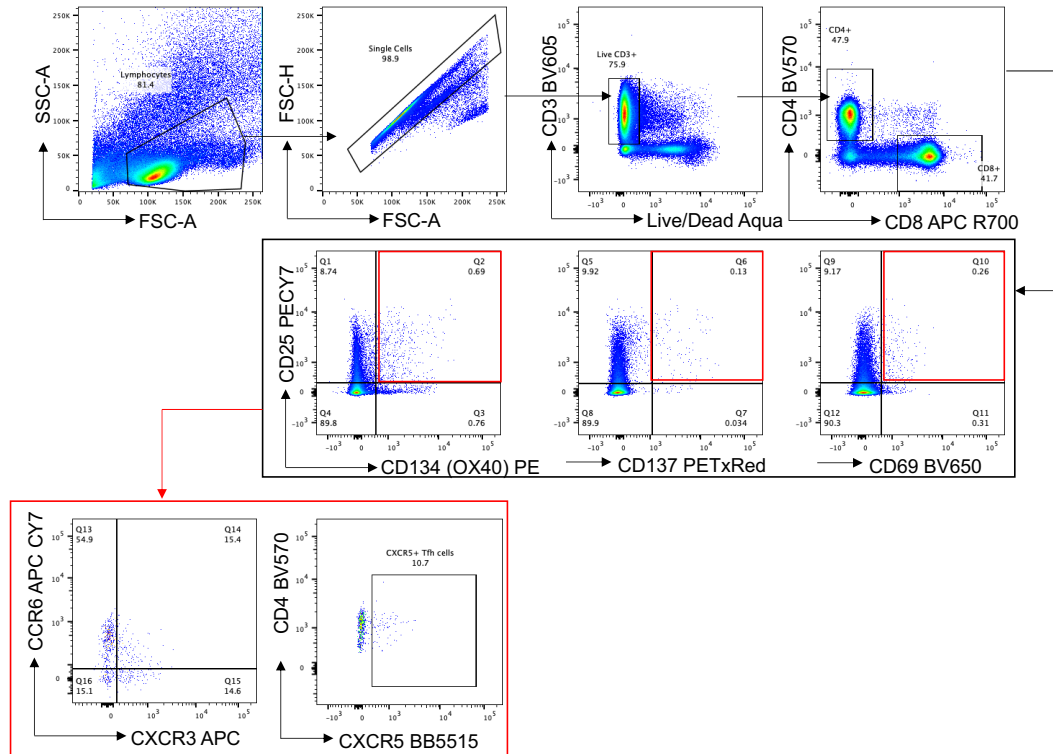

**C**

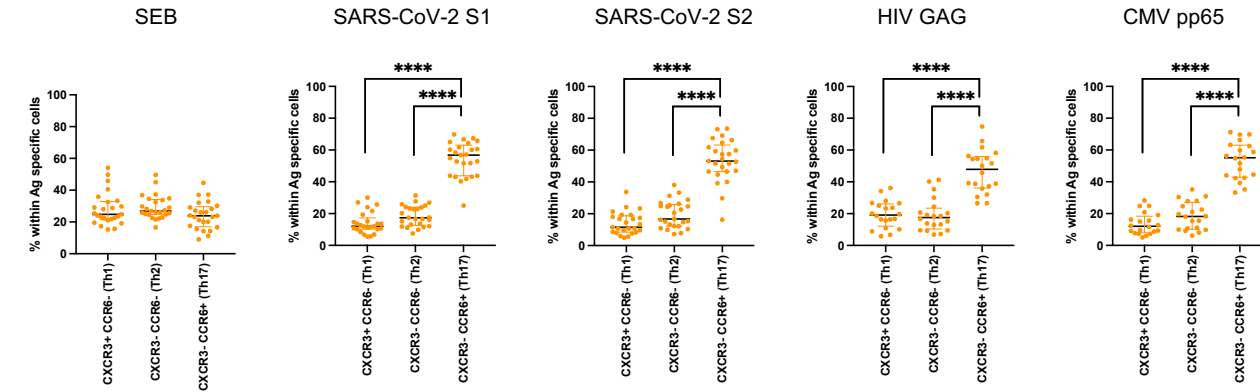

**Supplementary figure 6 : Pre-existing cross-reactive CD8+ T cell responses in PWH measured at baseline are associated with high magnitude CD8+ T cell responses post ChAdOx1 nCoV-19 vaccination**

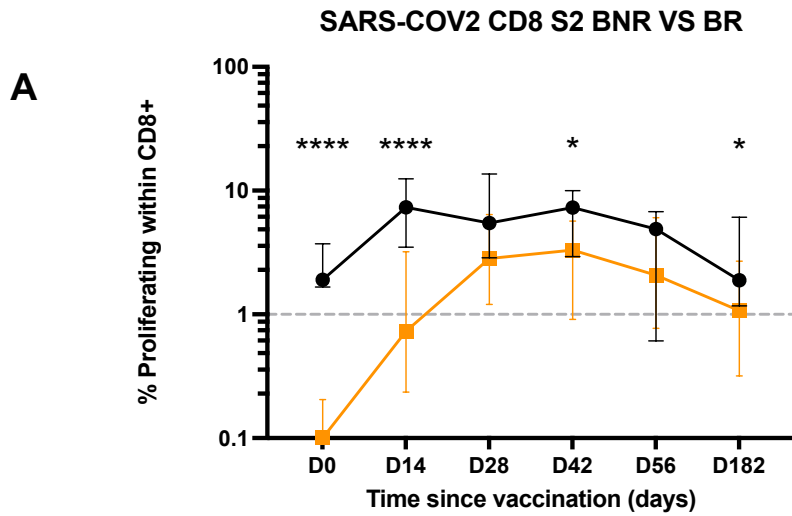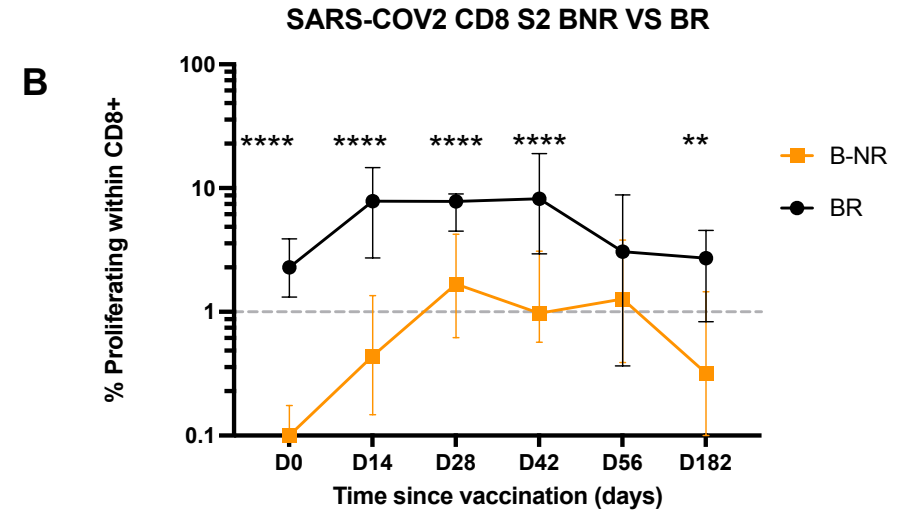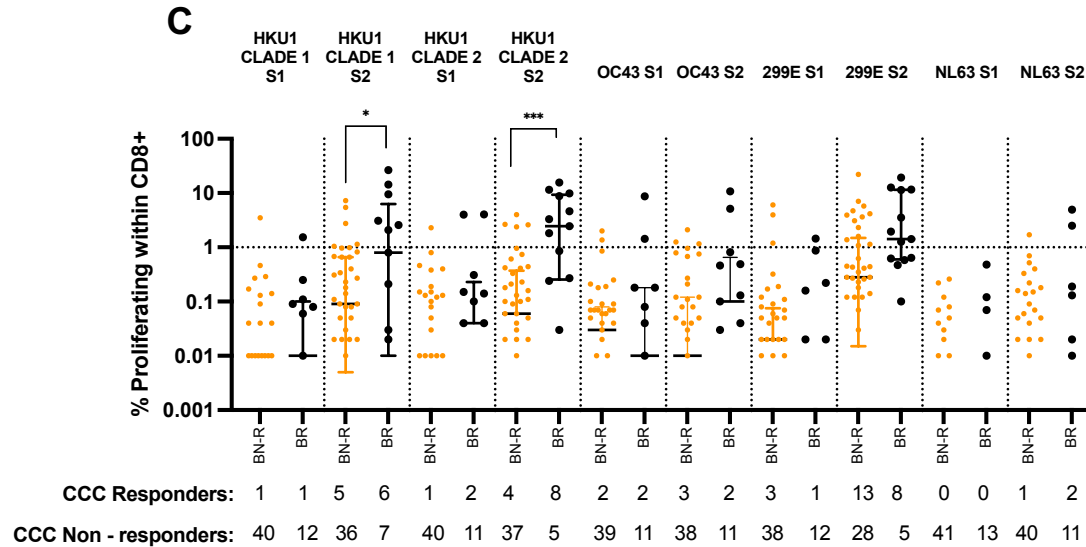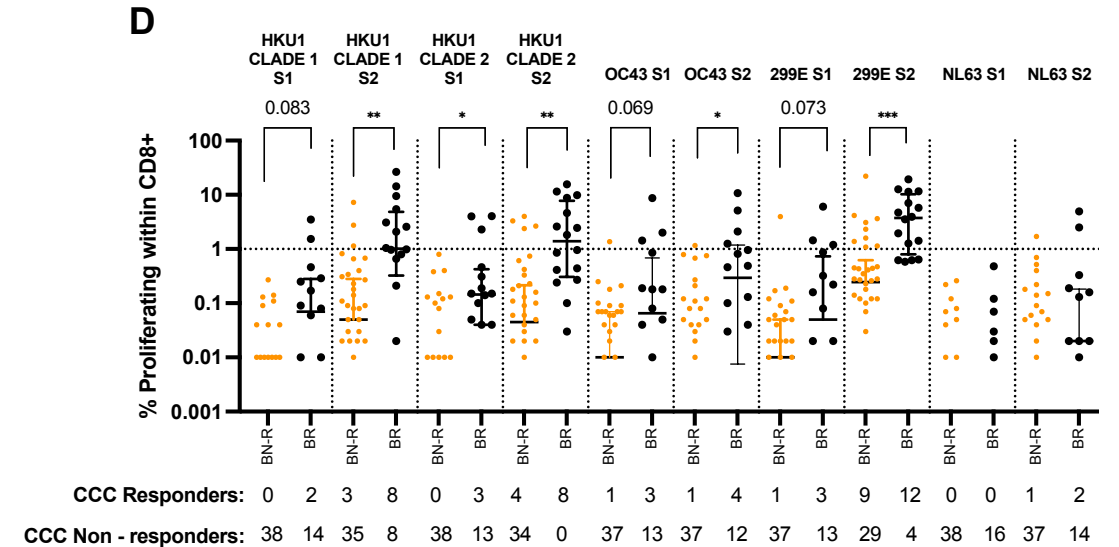

**Supplementary figure 7: Relationship between baseline and post vaccination. timepoints for CD4+ and CD8+ proliferative T cells**

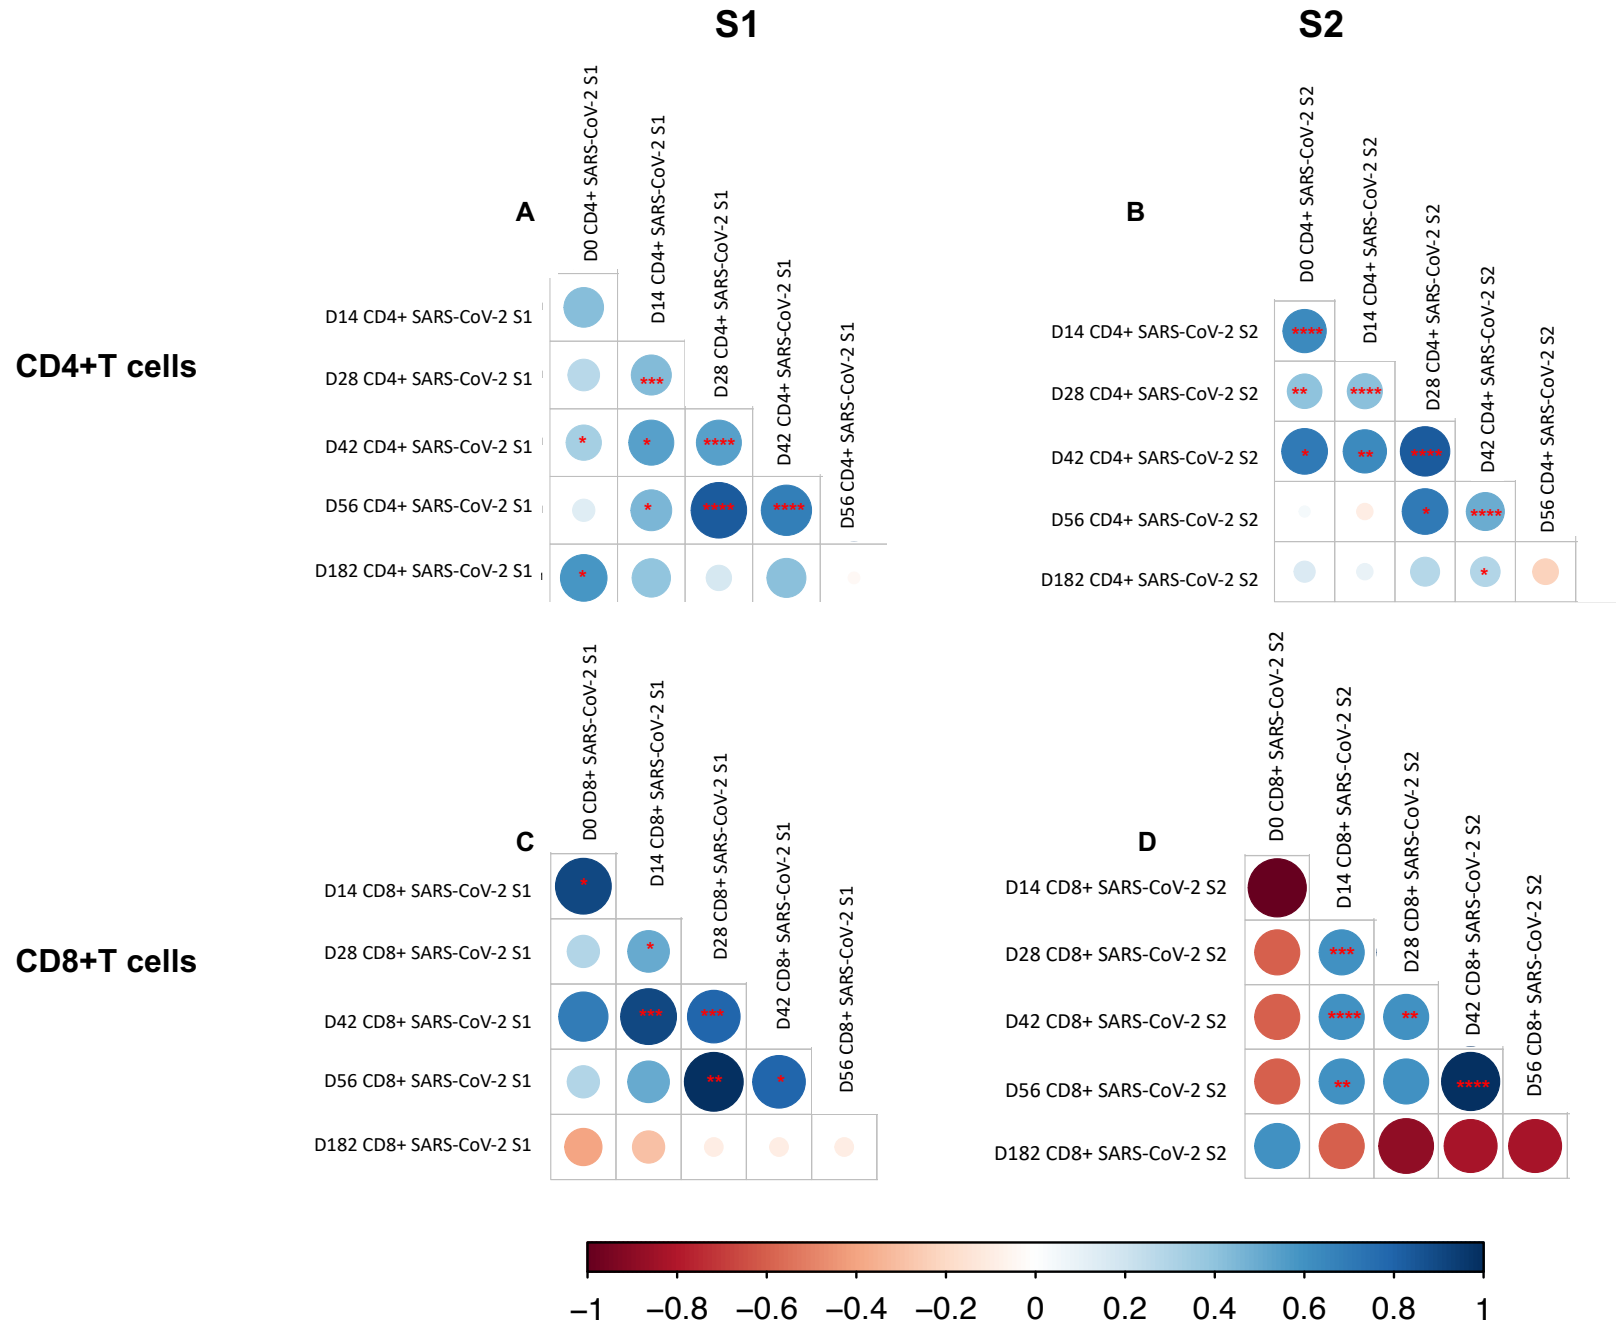

# Supplementary figure 8: Responses to CCC in PWH

CD4+ T cells

S1

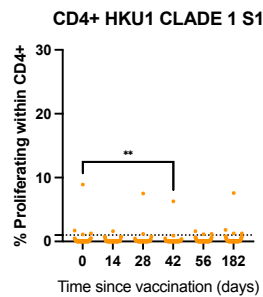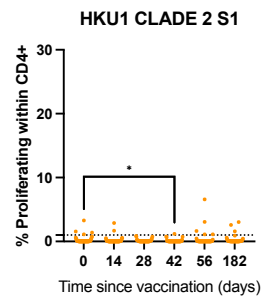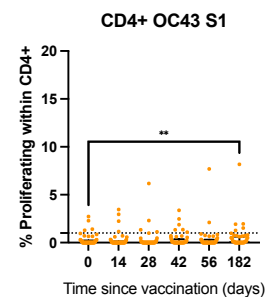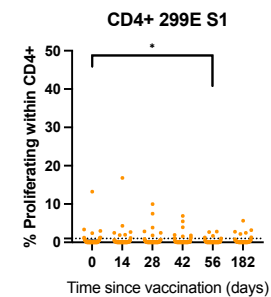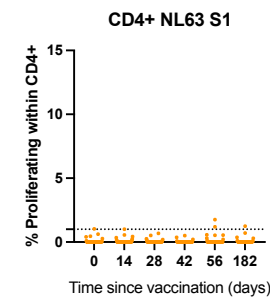

S2

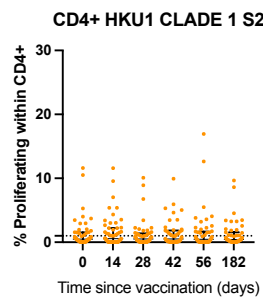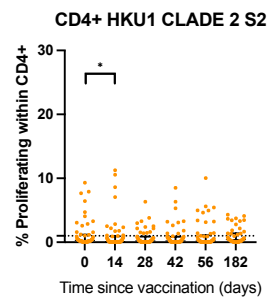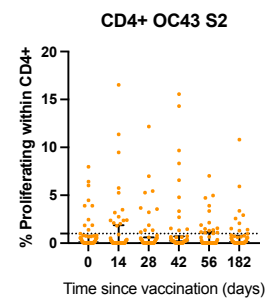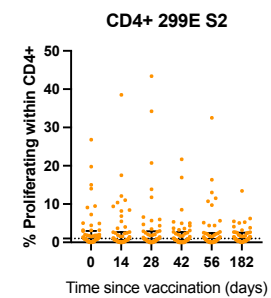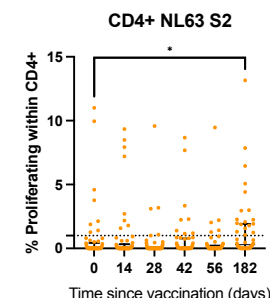

CD8+ T cells

S1

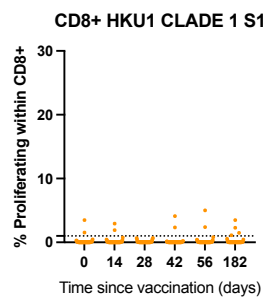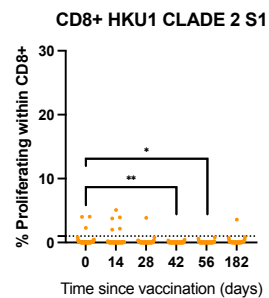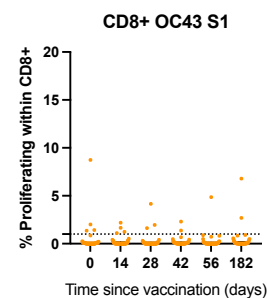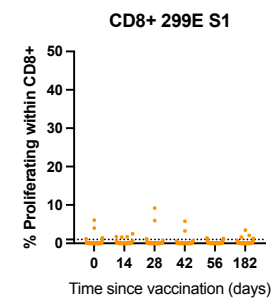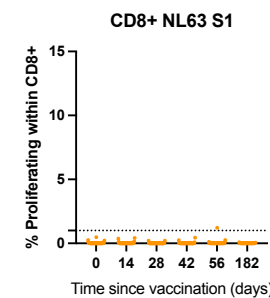

S2

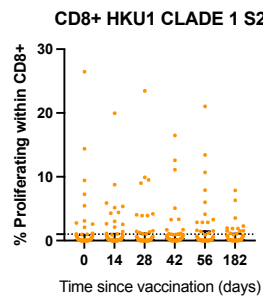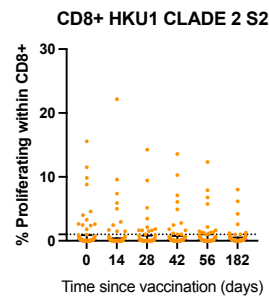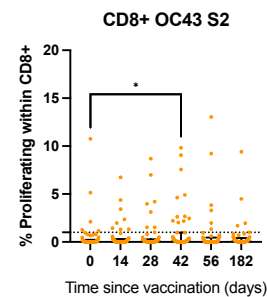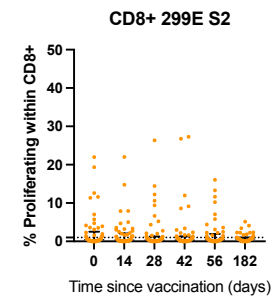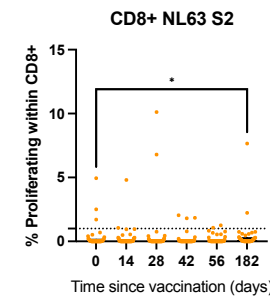



# Supplementary figure 9: Relationship between antibody responses for SARS-CoV-2 and CCCs spike in PWH

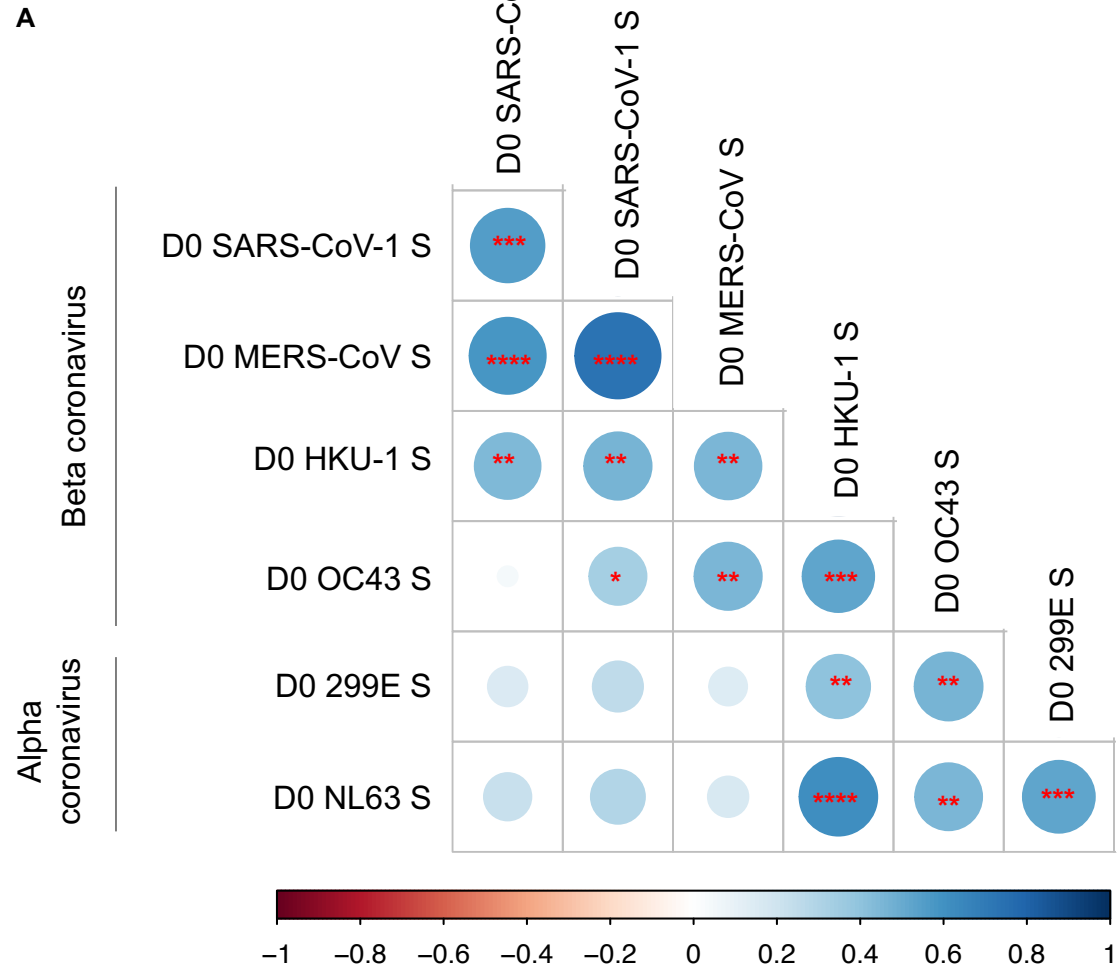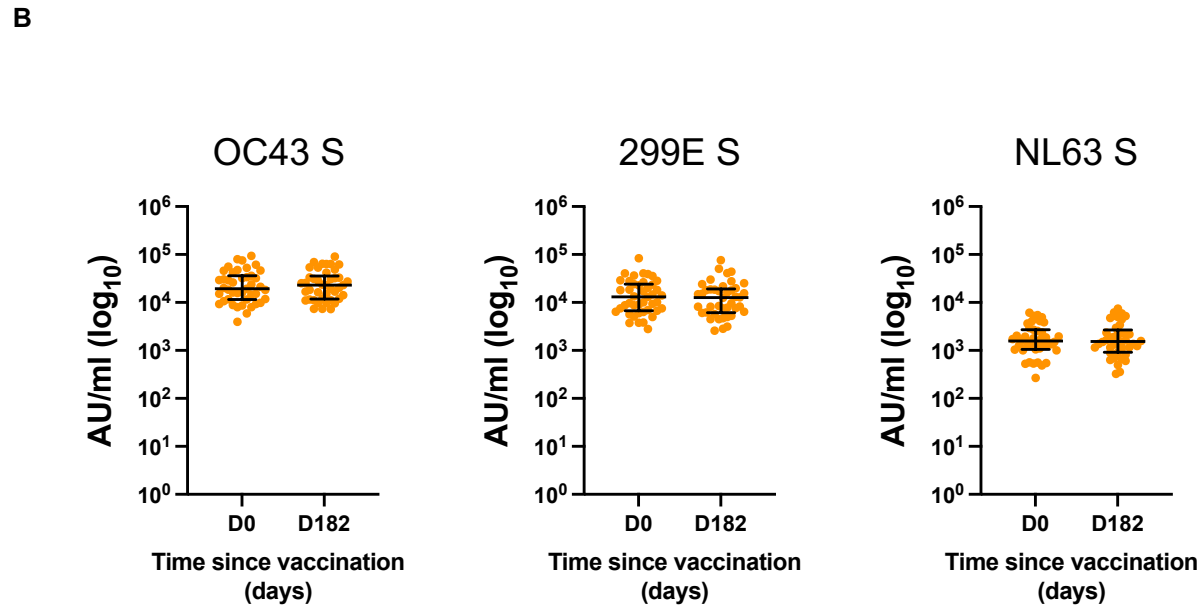

Supplement: Supplementary file [file media-1.pdf]
